# Supplementary material for: Albumin orchestrates a natural host defense mechanism against mucormycosis
Source: Research Square preprint supplement (doi:10.21203/rs.3.rs-5441197/v1), 2024-12-03
Supplement: Supplementary file 1 [file 51c94c80e5a7d71d7a94be01.xlsx]

## Sheet: AA analysis
Amino Acid	RPMI media alone			RPMI +BSA (45mg/dL)			Flow Through
Serine	0.00105318	0.000911302	0.0007836	0.00127368	0.0011413	0.000973078	0.00115906	0.00110804	0.000878524
Proline	0.0065563	0.00703615	0.00642299	0.0021659	0.00302812	0.00312975	0.00435532	0.00411483	0.00507444
Valine	0.0721227	0.0810006	0.0790507	0.00566778	0.00524194	0.00368389	0.0467177	0.0567059	0.0430959
Threonine	0.0420575	0.0533556	0.0439779	0.00335937	0.00586257	0.00625658	0.0312333	0.0301505	0.0383031
Isoleucine	0.120725	0.149352	0.158311	0.0136664	0.022167	0.0300449	0.100296	0.10915	0.110522
Aspartic acid	0.00137627	0.00109918	0.00172964	0.00166395	0.00112534	0.00146944	0.00149816	0.00111428	0.00146941
Lysine	0.0225416	0.0180078	0.0197117	0.0134877	0.0147187	0.0136266	0.0208239	0.0192899	0.0172742
Glutamic acid	0.00966573	0.00957553	0.00704517	0.00500579	0.00527455	0.00603167	0.0114701	0.00797059	0.00994118
Methionine	0.0459102	0.0557971	0.0595956	0.00368935	0.00501071	0.00186587	0.0275616	0.0250796	0.0210424
Histidine	0.0358506	0.044907	0.036717	0.00315319	0.00507243	0.00600111	0.0278868	0.027644	0.0356615
Phenylalanine	0.0312897	0.0346798	0.0394165	0.0126685	0.0151227	0.00967851	0.0374356	0.0399181	0.0292076
Arginie	0.0306756	0.0322523	0.0333065	0.0127802	0.0148304	0.0121293	0.0364672	0.0355193	0.0318286
Tyrosine	0.0369531	0.0478088	0.0496853	0.00458042	0.00997805	0.00476446	0.0261943	0.0332157	0.0374174

## Sheet: Trace elements and other
Trace Elements and other parameters	RPMI media alone			RPMI +BSA (45mg/dL)			Flow Through
Na	247	250	251.5	267	270	276.25	247.2	254	250
K	186	184	189	174.8	176	173	190	192.4	188.5
Ca	5	4.5	4	6.2	5.4	4.7	6	5.4	4.8
Mg	6	5	4	7	6.6	7.6	6	6.1	6.2
Cu	0	0	0	0.4	0.3	0.2	0	0	0
Fe	0	0	0	0	0	0	0	0	0
pH	7	7	7	6.98	6.98	6.98	7.17	7.17	7.17
Glucose	0,2% w/v	0,2% w/v	0,2% w/v	0,2% w/v	0,2% w/v	0,2% w/v	0,2% w/v	0,2% w/v	0,2% w/v

## Sheet: Vitamins
Vitamins	RPMI media alone			RPMI +BSA (45mg/dL)			Flow Through
Cyanocobalamin (B12)	271	272	273	251	252	253	0	0	0
Folic Acid (B9)	33358	33359	33360	33973	33974	33975	25519	25520	25521
Riboflavin (B2)	28756	28757	28758	28813	28814	28815	3853	3850	3850
Thiamine (B1)	184447	184448	184449	103180	103181	103182	113990	113994	113992
Biotin (B7)	51938	51939	51940	48710	48711	48712	48588	48589	48590
Ca-panthenoate (B5)	1944	1945	1946	1380	1381	1382	1539	1541	1543
Pyridoxine (B6)	825445	825446	825447	757657	757658	757659	112363	112368	112367
Nicotinamide (B3)	6984	6985	6986	6700	6701	6702	3569	3570	3571
Choline Chloride	848296	848297	848298	850036	850037	850038	725835	725836	725837
PABA	159487	159488	159489	163558	163559	163560	159209	159210	159211
