# Supplementary material for: Albumin orchestrates a natural host defense mechanism against mucormycosis
Source: Research Square preprint supplement (doi:10.21203/rs.3.rs-5441197/v1), 2024-12-03
Supplement: Supplementary file 2 [file c3620c0c673eaa83fad5b8a7.xlsx]

## Sheet: Matched Control Patients_Fig1a
Matched control patients (The MDACC)
# Patient	Sex	Age	Serum albumin (g/dL)	Predisposing Factors
1	F	69	3.9	MDS
2	M	67	4.3	ALL
3	F	64	4.1	multiple myeloma
4	F	55	3.1	multiple myeloma
5	M	52	3.7	AML
6	M	78	4.0	AML
7	M	60	3.0	AML
8	M	35	4.2	AML
9	M	65	3.1	AML
10	M	64	3.4	CLL
11	M	56	3.9	MDS
12	F	47	3.6	MDS
13	M	51	4.0	CLL		Abbreviations. AML = acute myeloid leukemia; ALL = acute lymphoblastic leukemia; BM = bone marrow; CLL = chronic lymphocytic leukemia, CMML = chronic myelomonocytic leukemia, MDS = myelodysplastic syndrome, MM = multiple myeloma, N/A = non avaliable
14	M	59	2.4	AML
15	M	38	4.0	CML
16	M	59	3.0	AML
17	M	60	4.2	Lymphoma
18	M	71	N/A	MDS
19	M	64	4.1	hairy cell leukemia
20	M	66	3.6	multiple myeloma
21	F	57	4.6	ALL
22	M	26	3.5	ALL
23	M	66	3.9	CLL
24	M	57	3.8	Lymphoma
25	F	61	3.7	Lymphoma
26	M	52	3.3	Lymphoma
27	F	71	1.8	AML
28	M	53	3.3	Lymphoma
29	M	53	2.8	ALL
30	F	68	3.4	MDS
31	M	73	3.3	multiple myeloma
32	F	71	3.3	CML
33	M	31	2.9	Lymphoma
34	F	79	3.1	AML
35	F	52	N/A	Lymphoma
36	M	63	N/A	multiple myeloma
37	M	67	N/A	MDS
38	M	75	N/A	AML
39	F	58	N/A	CLL
40	M	53	N/A	Lymphoma
41	M	55	N/A	ALL
42	M	25	N/A	AML

## Sheet: Pulmonary Mucormycosis Fig1a
Pulmonary mucormycosis (The MDACC)
# Patient	Sex	Age	Serum albumin (g/dL)	Predisposing Factors
2	M	39.4086	2.3	ALL
4	F	65.9822	3.0	AML
5	F	55.8576	2.2	AML
6	M	53.41	N/A	AML
8	M	52.063	2.8	ALL
9	M	67.1485	3.2	AML
10	M	48.4298	3.2	ALL
12	M	41.2649	2.5	AML
14	M	66.4203	3.0	AML
15	F	69.1444	2.3	AML
17	F	33.514	2.8	AML
19	M	43.9261	N/A	AML
22	M	45.3196	2.6	CLL
23	M	64.9473	2.6	CLL
24	F	50.9596	2.6	AML
25	F	42.1246	1.1	AML		Abbreviations. AML = acute myeloid leukemia; ALL = acute lymphoblastic leukemia; BM = bone marrow; CLL = chronic lymphocytic leukemia, CMML = chronic myelomonocytic leukemia, MDS = myelodysplastic syndrome, MM= multiple myeloma
26	M	53.2019	3.2	CMML
27	M	43.5674	2.8	AML
28	M	45.9685	2.9	CML
29	F	70.0123	2.3	AML
30	M	56.1232	2.4	MM
31	M	38.1875	2.6	CML
34	M	52.0356	1.6	CLL
37	M	38.3874	N/A	AML
38	M	39.6057	3.2	AML
39	F	29.6427	N/A	AML
40	F	46.5736	N/A	CLL
50	M	45.8289	N/A	Lymphoma
51	F	53.5387	N/A	AML
54	F	59.9042	2.9	AML
56	F	52.2409	N/A	AML
57	F	29.2019	N/A	AML
58	M	29.692	N/A	Lymphoma
59	M	53.9959	N/A	Lymphoma
60	M	67.7344	N/A	AML
64	M	61.4867	N/A	CLL
65	M	55.9836	3.0	ALL
66	M	52.1177	N/A	ALL
67	M	25.8508	3.4	AML
70	F	45.5168	2.4	CLL
71	M	76.4189	2.4	CLL
73	F	60.0548	2.0	MM
74	M	59.7125	2.9	CML
75	M	22.2834	N/A	ALL
76	F	56.4463	3.0	AML
77	M	63.3128	2.1	AML
87	F	24.6133	N/A	AML
88	F	43.3785	3.4	Granulocytic sarcoma
89	F	25.6783	N/A	Lymphoma
92	M	56.5175	3.3	AML
94	M	56.9692	2.9	Lymphoma
95	M	23.4908	2.3	ALL
97	M	53.1964	N/A	AML
101	F	23.8823	2.9	Lymphoma
102	M	34.8309	N/A	CML
103	M	67.5455	2.7	CLL
104	M	25.692	2.7	Lymphoma
112	M	37.4209	2.0	ALL
115	F	61.462	N/A	AML
116	M	51.2115	2.9	AML
117	F	33.6564	4.2	AML
120	M	75.718	3.5	AML
121	M	47.3785	3.2	ALL
122	M	61.4976	3.1	CLL
123	M	67.0746	3.0	AML
124	M	45.5551	2.5	CLL
127	F	53.2512	3.2	ALL
128	M	68.6845	2.9	AML
131	M	54.9	2.2	AML
132	M	62.9	2.5	AML
133	M	43.5	2.2	ALL
137	M	75.9	3.0	AML
138	F	65.4	3.9	AML
139	F	22.8	3.1	AML
140	M	52.1	2.8	AML
141	F	68.8	2.9	AML
142	M	25.4	2.8	ALL
143	M	23.3	3.5	AML
144	M	34	2.9	ALL
145	F	60.8	3.4	ALL
148	M	71.2	2.3	AML
149	M	67.1	1.9	MM
152	M	67.4	2.4	AML
153	M	18.5	3.6	ALL
154	M	65.6	1.9	AML
155	M	61.7	2.5	AML
157	F	45.1	3.1	AML
158	F	49.7	3.3	AML
159	M	62.8	2.6	AML
160	M	66.9	3.5	AML
161	F	46.8	3.4	Lymphoma
162	F	65.3	2.7	AML
163	M	26.5	3.5	AML
165	M	58.4	1.8	Lymphoma
166	M	47.9	2.3	Lymphoma
167	M	70.4	2.5	AML
169	F	22.5	3.2	ALL
170	F	39.5	N/A	ALL
173	M	74.8	3.3	AML
176	F	59.9	N/A	AML
178	F	47.7	3.1	MDS
180	F	28.1	2.7	AML
182	M	52.2	3.1	AML

## Sheet: Pulmonary Aspergillosis Fig1a
Pulmonary aspergillosis (The MDACC)
# Patient	Sex	Age	Serum albumin (g/dL)	Predisposing Factors	Type of Infection
1			3.6	AML	PFP
2			4.2	AML	PFP
3			2.9	AML	PFP
4			3.5	AML	Fusarium fungemia	Abbreviations. AML: acute myeloi leukemia, MM: multiple myeloma, Adeno: adenocarcinoma, NEC: neuroendocrine carcinoma, HCC: hepatocellular carcinoma, CML: chronic myeloid leukemia, ALL: acute lympoid leukemia, MDS: myelodysplastic, DLBCL: diffuse large B-cell lymphoma, PFP: probable fungal pneumonia, PNA: pneumonia, FS: fungal sinusitis,
5			3.2	AML	PFP
6			4.1	AML	PFP
7			4.1	AML	PFP
8			3.8	AML	PFP
9			2.8	AML	PFP
10			2.7	AML	Aspergillus PNA
11			3.9	AML	PFP
12			3.1	AML	PFP
13			3.7	AML	PFP
14			2.0	AML	PFP
15			3.0	AML	PFP
16			3.3	AML	PFP
17			3.5	AML	FS
18			3.7	AML	PFP
19			3.0	AML	PFP
20			2.8	AML	PFP
21			4.1	AML	PFP
22			4.6	AML	PFP
23			3.2	AML	PFP
24			3.4	AML	PFP
25			3.2	AML	PFP
26			2.9	AML	PFP
27			3.5	MM	A. fumigatus PNA
28			3.7	AML	A. niger PNA
29			3.0	lymphoma	A. fumigatus PNA
30			3.6	Liver adeno	A. flavus PNA
31			3.1	AML	A. flavus PNA
32			3.8	NEC	A. niger PNA
33			3.1	HCC	A. fumigatus/Malbranchae sp PNA
34			2.6	MM	A. fumigatus PNA
35			3.2	myelofibrosis	A. terrus PNA
36			4.7	AML	A. flavus sinusitis
37			4.2	AML	A. versicolor/A. calidoustus PNA
38			3.1	NHL	Aspergillus fungemia
39			2.9	CML	Aspergillus fungemia
40			3.3	ALL	A. fumigatus PNA
41			3.0	AML	A. fumigatus PNA
42			3.1	AML	A. fumigatus PNA
43			3.9	T-cell lymphoma	A. flavus PNA
44			3.3	AML	A. fumigatus PNA
45			4.2	MDS	A. fumigatus PNA
46			3.1	Aplastic anemia	A. nidulans PNA
47			3.1	AML	A. nidulans PNA
48			2.8	AML	A. fumigatus fungemia
49			3.1	AML	Aspergillus PNA
50			3.3	DLBCL	A. flavus PNA

## Sheet: PGIMER, Chandigarh, India Fig1b
Pulmonary Mucormycosis (PGIMER, Chandigarh, India)
# Patient	Sex	Age	Serum albumin (g/dL)	Predisposing Factors
CC351	M	45	1.53	Covid-19, DM
CC4	M	55	1.74	DM
CC7	M	52	1.85	Covid-19, DM
CC3	M	37	1.9	Covid-19, DM
CC10	M	55	2	Covid-19, DM
CC5	F	47	2.03	DM
CC2	M	68	2.14	Covid-19, DM
CC1	M	60	2.18	DM
CC17	M	65	2.19	DM
CC14	M	37	2.19	Covid-19, DM
CC6	M	61	2.2	Covid-19, DM
CC35	M	60	2.23	Post Covid Chronic liver disease (6months), DM	Abbreviations: DM = diabetes mellitus, RT = renal transplatation, CAD = coronary artery disease, ET = essential thrombocytosis, CKD= chronic kidney disease, HBV = hep B virus, HCV = hep C virus
CC33	M	50	2.29	Covid-19, DM
CC341	F	45	2.3	DM
5A	M	35	2.32	DM
CC18	M	80	2.35	Covid-19, DM
CC26	M	50	2.36	Covid-19, DM
CC15	M	45	2.38	DM
Tx3	M	36	2.4	RT
CC27	M	55	2.4	DM
CC9	F	61	2.5	Covid-19, DM
CC11	F	55	2.59	DM
6B	M	55	2.61	DM
CC32	F	47	2.65	Covid-19, DM
CC22	M	30	2.67	Covid-19, DM
CC21	M	55	2.7	DM
CC12	F	27	2.74	DM
Tx5	M	40	2.74	RT
11A	M	30	2.78	DM
CC29	M	57	2.79	Covid-19, DM
CC19	M	49	2.81	DM
CC13	M	50	2.87	DM
7A	F	70	2.89	DM
CC24	M	60	2.9	DM
CC31	M	67	3.1	CAD, DM
CC25	F	43	3.1	DM
CC23	M	58	3.24	Covid-19, DM
CC28	M	52	3.4	HBV, HCV, DM
Tx2	M	28	3.69	RT
Tx1	F	23	3.7	RT, DM
Tx6	M	43	3.7	CKD, RT
CC8	M	59	3.8	Covid-19, DM
CC30	M	47	4.11	Covid-19, DM
CC331	M	38	4.16	Covid-19, DM
pal1	F	52	2.9	RT, DM
pal2	F	28	2.6	RT, DM
pal3	F	36	2.1	RT, DM
pal4	M	61	2.32	DM
pal5	M	35	1.9	DM
pal6	M	64	3.26	RT, DM
pal7	F	64	3	DM
pal8	M	75	2.5	DM
pal9	F	60	2.4	DM
pal10	M	45	2.2	DM
pal11	M	40	2	/
pal12	M	48	1.9	DM
pal13	M	42	1.9	DM
pal14	M	22	4.3	/
pal15	M	55	3.2	/
pal16	F	36	2.8	RT, DM
pal17	F	40	2.2	DM
pal18	M	49	2.05	/
pal19	M	60	2.04	DM
pal20	M	28	1.9	RT
pal21	M	61	4.1	DM
pal22	M	18	3.15	RT
pal23	M	56	2.9	RT, DM
pal24	M	50	2.76	RT, DM
pal25	M	50	2.7	DM
pal26	M	65	2.1	DM
pal27	M	46	4.3	DM
pal28	F	65	4.2	DM
pal29	F	47	4	DM
pal30	M	47	3.7	RT, DM
pal31	F	54	3.7	DM
pal32	M	50	3.6	/
pal33	M	60	3.5	DM
pal34	F	41	3.29	DM
pal35	M	44	3.2	DM
pal36	M	60	3.14	DM
pal37	M	53	3.1	RT, DM
pal38	F	72	3.1	DM
pal39	M	65	3.1	/
pal40	M	49	2.8	DM
pal42	M	29	2.7	RT, DM
pal43	M	55	2.7	DM
pal44	M	35	2.7	DM
pal45	M	47	2.6	RT, DM
pal46	M	69	2.6	DM
pal47	F	60	2.5	DM
pal48	M	35	1.93	/
pgIalbAV1	M	47	2.25	DM
pgIalbAV2	M	50	3.22	ET, DM
pgIalbAV3	F	20	1.73	DM
pgIalbAV4	F	45	2.35	DM
pgIalbAV5	M	60	2.68	DM
pgIalbAV6	M	66	3.3	DM
pgIalbAV7	M	66	3.1	DM
pgIalbAV8	F	28	3.74	DM
pgIalbAV9	F	37	3.9	DM
pgIalbAV10	M	54	4.05	DM
pgIalbAV11	M	49	2.67	DM
pgIalbAV12	M	47	2.5	DM
pgIalbAV13	M	58	2.72	DM
pgIalbAV14	M	60	3.84	DM
pgIalbAV15	M	50	3.4	DM
pgIalbAV16	F	48	1.97	DM
pgIalbAV17	M	45	2.44	DM
pgIalbAV18	F	38	3.56	DM
pgIalbAV19	F	45	3.43	DM
pgIalbAV20	M	52	3.63	DM
pgIalbAV21	M	52	2.9	DM
pgIalbAV22	M	60	3.62	DM
pgIalbAV23	M	55	2.9	DM
pgIalbAV24	F	75	2.8	DM
pgIalbAV25	M	35	3.7	DM
pgIalbAV26	M	50	2.85	DM

## Sheet: Cirrhotic patients Fig1c 
Cirrhotic patients (University Hospital of Heraklion, Crete)
# Patient	Sex	Age	Serum albumin (g/dL)	Predisposing Factors
C1	57	M	2.3	HCC
C2	70	M	3.1	Alcoholic cirrhosis
C3	67	M	2.7	HCV, HCC
C4	76	M	2.8	NASH
C5	81	F	2.3	NASH		Abbreviations. HCC: hepatocellular carcinoma, HCV: hepatitis C virus, HBV: hepatitis B virus, NASH: non alcoholic steatohepatitis, ASH: alcoholic steatohepatitis, WD: wilson disease.
C6	61	M	2.5	HCV, HCC
C8	75	M	3.8	NASH, ASH
C9	80	M	2.4	Alcoholic cirrhosis
C10	42	M	4.2	HBV, HDV
C11	64	M	2.7	Alcoholic cirrhosis
C12	61	M	2.9	HCV, HCC
C13	68	F	4.3	NASH, ASH
C15	62	F	3.3	HCV, HCC
C16	71	M	3.7	Alcoholic cirrhosis
C17	66	F	4.4	HCV
C18	56	M	4.4	Alcoholic cirrhosis
C19	54	M	4.3	WD
C20	56	F	4.1	HCV

## Sheet: Hematological malignancy Fig 1d
Hematological malignancy patients (Alexandra General Hospital, Therapeutics Clinic, Univeristy of Athens)
# Patient	Sex	Age	Serum albumin (g/dL)	Predisposing Factors
HM1	F	67	3.5	MM
HM2	M	83	3.7	MM, HTN, DLD, Gastritis
HM3	M	76	4.1	Waldenstrom, HTN, Prost.Ca, BCC
HM4	M	76	3.1	MM
HM5	M	85	2.3	NSCLC, CAD, COPD
HM6	M	85	3.3	Bl. Ca, DM, HTN		Abbreviations. MM: multiple myeloma, HTN: hypertension, DLD: dyslipidemia, Prost. Ca: Prostatic cancer, BCC: basal cell carcinoma, NSCLC: non small cell lung carcinoma, CAD: coronary artery disease, COPD: chronic obstructive pulmonary disease, Bl. Ca: bladder cancer, DM: diabetes mellitus, RTI: respiratory tract infection, Afib: atrial fibrilation, PHP: prostate hypeplasia, NS: nephrotic syndrome…
HM7	M		2.8	NSCLC, CAD, COPD
HM8	F	64	2.3	Ovarian cancer
HM9	M	78	2.6	MM, RTI, Afib, PHP
HM10	F	54	2.3	Breast cancer, Hypothyroidism
HM11	M	74	2.8	MM, Afib, HTN, CD, PHP
HM12	F	73	2.5	Amyloidosis, NS, Osteoporosis
HM13	M	38	3.3	LCDD, NS
HM14	F	79	2.3	MM, HTN, DLD
HM15	M	57	4.1	MM, HTN, DLD, HypoTh
HM16	F	70	4.1	MM, HTN
HM17	F	64	3.1	Amyloidosis, NS, Osteoporosis
HM18	F	71	2.3	Amyloidosis, NS, CD
HM19	M	50	3.3	Amyloidosis, NS
HM20	M	62	3.2	Amyloidosis, NS, HypoTh

## Sheet: Healthy Controls Fig 3b
	Healthy Controls (University Hospital of Heraklion, Crete)
# Patient	Type of Infection	Sex	Age	Serum albumin (g/dL)	Status
N1	Control (no infection)	F	29	4.4	Outpatient
N2	Control (no infection)	F	37	4.2	Outpatient
N3	Control (no infection)	F	47	4.3	Outpatient
N4	Control (no infection)	Ν/Α	Ν/Α	3.7	Healthy donor (Blood bank)
N5	Control (no infection)	F	83	2.9	Outpatient		Abbreviations. AHSCT: allogeneic hematopoetic stem cell transplantation, AML: acute myeloid leukemia, MDS: myelodysplastic syndrome, N/A non avaliable
N6	Control (no infection)	Ν/Α	Ν/Α	4.3	Healthy donor (Blood bank)
N7	Control (no infection)	Ν/Α	Ν/Α	4.5	Healthy donor (Blood bank)
N8	Control (no infection)	Ν/Α	Ν/Α	4.1	Healthy donor (Blood bank)
N9	Control (no infection)	Ν/Α	Ν/Α	4.6	Healthy donor (Blood bank)
N10	Control (no infection)	Ν/Α	Ν/Α	4.7	Healthy donor (Blood bank)
N11	Control (no infection)	M	46	3.3	Outpatient
N12	Control (no infection)	M	71	3.2	Outpatient
N13	Control (no infection)	F	32	4.5	Outpatient
N14	Control (no infection)	F	20	4	Outpatient
N15	Control (no infection)	F	66	4.6	Outpatient
N16	Control (no infection)	F	67	3.4	Outpatient
N17	Control (no infection)	M	91	3.5	Outpatient
N18	Control (no infection)	F	33	3.5	Outpatient
N19	Control (no infection)	M	66	4.6	Outpatient
N20	Control (no infection)	F	60	3.6	Outpatient
N21	Control (no infection)	F	60	3.9	Outpatient

## Sheet: Clinical Cohort Fig 3a
Hematological malignancy patients (Universitair Ziekenhuis Leuven and ICU Unit at the University Hospital of Crete)
# Patient	Type of Infection	Sex	Age	Serum albumin (g/dL)	Predisposing Factors
M1 (A1)	Disseminated (lung, cutaneous) mucormycosis	M	57	2.52	ALL
M2 (A13)	Disseminated (lung, cerebral) mucormycosis	M	8	3.62	AML
M3 (A23)	Pulmonary mucormycosis	M	29	1.89	LT
M4 (A31)	Rhinocerebral mucormycosis	F	54	2.71	CD (AZA neutropenia)
M5 (A38)	Pulmonary mucormycosis	F	50	3.71	COPD		Abbreviations. PM: pulmonary mucormycosis, AHSCT: allogeneic hematopoetic stem cell transplantation, ALL: acute lymphoblastic leukemia, AML: acute myeloid leukemia, MDS: myelodysplastic syndrome, COPD: chronic obstructive pulmonary disease, LT: lung transplantation, LiT: Liver transplatation, CD: Crohn's disease, AZA: azathrioprine, DM: diabetes mellitus, DKA: diabetic keto-acidosis, GPA: granulo…
M6 (A39)	Pulmonary mucormycosis	M	54	2.9	DKA
M7 (A43)	Disseminated mucormycosis (lung, pleura, pericardium, myocardium, spleen)	M	61	2.17	ALL
M8 (A56)	Disseminated mucormycosis (lung, liver)	M	58	4.05	AML
M9 (A57)	Pulmonary mucormycosis	M	78	4.41	MDS
M10 (A67bis)	Pulmonary mucormycosis	M	66	3.00	AHSCT
M_GR (Univeristy Hopsital of Crete)	Disseminated mucormycosis (sinuses, skin)	M	70	2.1	Severe bacterial sepsis (ICU)
M11 (1)	Pulmonary mucormycosis	M	74	3.05	DM, GPA
M12 (2)	Pulmonary mucormycosis	M	67	3.28	AML, AHSCT
M13 (3)	Cutaneous mucormycosis	M	58	3.03	AHSCT (AML)
M14 (4)	Pulmonary mucormycosis	F	63	2.46	AML
M15 (5)	Pulmonary mucormycosis	M	52	3.19	LT (Cirrhosis)
M16 (6)	Pulmonary mucormycosis	M	44	2.77	DM, AHSCT(CVID)
M17 (7)	Disseminated mucormycosis (lung, sinus, septic emboli)	M	57	2.89	LT (a1aad)
Asp1 (A)	Pulmonary aspergillosis	F	59	3.35	AML, DM
Asp2 (B)	Pulmonary aspergillosis	F	66	3.54	AHSCT (MDS)
Asp3 ( C)	Pulmonary aspergillosis	F	62	2.28	AHSCT (AML)
Asp4 (D)	Pulmonary aspergillosis	M	28	3.45	AML
Asp5 (E)	Pulmonary aspergillosis	M	67	3.56	AHSCT
Asp6 (F)	Pulmonary aspergillosis	F	66	3.18	AML, COPD
Z	Matched control patient (no infection)	F	69	3.35	AHSCT (MDS)
Y	Matched control patient (no infection)	M	57	3.73	AML
X	Matched control patient (no infection)	M	47	2.95	AHSCT
W	Matched control patient (no infection)	M	44	3.5	AML
V	Matched control patient (no infection)	M	79	3.69	AML
U	Matched control patient (no infection)	M	79	3.08	AML
