# Supplementary material for: Albumin orchestrates a natural host defense mechanism against mucormycosis
Source: Research Square preprint supplement (doi:10.21203/rs.3.rs-5441197/v1), 2024-12-03
Supplement: Supplementary file 3 [file d6679ea3d0163e6012b51d76.xlsx]

## Sheet: Matched control pts fig.3a
	Control patients
Name	Formula	Mas	RT	U	V	W	X	Y	Z
C16:0	C16 H32 O2	256.241	7.73	833373	796071	486073	827650	1.28332e+06	1.60466e+06
C16:1	C16 H30 O2	254.225	7.22	125176	90141.2	50486.2	82062.7	276898	279379
2-C18:0	C18 H36 O2	284.272	8.51	820574	744200	660893	995942	757349	1.06938e+06
C18:1	C18 H34 O2	282.257	7.85	2.06449e+06	2.21801e+06	1.22428e+06	2.10095e+06	4.54828e+06	5.37975e+06
C18:2	C18 H32 O2	280.241	7.4	679482	957877	425671	604934	1.81142e+06	1.90123e+06
C18:3	C18 H30 O2	278.224	7.02	159153	135962	93152.4	91728.9	211832	266548
C20:3	C20 H34 O2	306.255	7.73	59792.2	45032.7	32741.3	33482.3	108586	93577.6
C20:4	C20 H32 O2	304.241	7.33	1.12602e+06	1.12028e+06	496305	1.17219e+06	1.98267e+06	1.85761e+06
1-C20:5	C20 H30 O2	302.225	6.03	147902	106202	64588.3	134445	278682	214086
C22:4	C22 H36 O2	332.272	7.8	87848.1	73646.7	22454.9	64818.7	100390	205691
2-C22:5	C22 H34 O2	330.256	7.44	126881	95965.3	28204.2	85212.4	201197	287736
C22:6	C22 H32 O2	328.241	7.26	542489	830630	335054	751296	1.50213e+06	1.20426e+06
C16:0 -OH	C16 H32 O3	272.236	7.01	386872	331002	221615	410135	474016	354671
3-C18:0-OH	C18 H36 O3	300.267	7.69	216341	188335	177450	249040	246075	198034
2-C18:1-OH	C18 H34 O3	298.251	6.92	109885	125756	101318	124816	101203	143811
1-C18:1-2OH	C18 H34 O4	314.246	5.88	0	62976.3	217585	0	0	0
2-C18:1-2OH	C18 H34 O4	314.246	7.17	63251.2	57420.7	43794.3	87085.8	63699.1	80101.5
C18:2 -OH	C18 H32 O3	296.236	5.66	58389.6	50424.8	0	66323.5	42605.1	41623.9
C18:2 -2OH	C18 H32 O4	312.231	5.39	110123	219744	43122.7	210312	239867	220616
3-C20:0 -OH	C20 H40 O3	328.297	8.01	77991.4	36009.8	62734.2	77283.3	46995.1	75992.9
C20:4 -OH	C20 H32 O3	320.236	6.01	299270	64323.2	275939	339934	108580	122938
C22:6 -OH	C22 H32 O3	344.236	5.95	86011.3	10394.6	0	97698.2	82158.3	80266.3

## Sheet: Asp-IFIs pts_fig.3a
	Aspergillus patients
Name	Formula	Mas	RT	Asp1	Asp2	Asp3	Asp3	Asp5	Asp6
C16:0	C16 H32 O2	256.24	7.54	737132	901324	638415	395119	880011	759275
C16:1	C16 H30 O2	254.225	7	203386	399317	163386	40573	115557	222431
2-C18:0	C18 H36 O2	284.272	8.32	646913	553668	463573	449699	662246	571007
C18:1	C18 H34 O2	282.256	7.66	2682169	3865823	1123895	1258521	3078695	2581579
C18:2	C18 H32 O2	280.24	7.22	1613791	1846478	304489	451174	1550998	1723189
C18:3	C18 H30 O2	278.223	6.78	238480	270457	82392	80251	236730	314176
C20:3	C20 H34 O2	306.255	7.41	66402	47317	39108	47563	47467	55419
C20:4	C20 H32 O2	304.24	7.15	825852	1173839	774067	538669	700673	1138740
1-C20:5	C20 H30 O2	302.225	6.73	139102	96165	280347	56683	77213	140337
C22:4	C22 H36 O2	332.272	7.61	77115	89340	38712	20568	83694	113108
2-C22:5	C22 H34 O2	330.256	7.26	160503	97811	117342	23159	133800	211714
C22:6	C22 H32 O2	328.241	7.05	655277	582434	480867	300536	564117	753230
C16:0 -OH	C16 H32 O3	272.235	6.74	264548	249246	310478	205812	300292	228399
3-C18:0-OH	C18 H36 O3	300.267	7.47	139501	132646	103982	128547	136921	133955
2-C18:1-OH	C18 H34 O3	298.251	6.66	174279	133523	0	0	141411	57717
1-C18:1-2OH	C18 H34 O4	314.245	6.94	40706	39701	54440	220638	44982	83877
2-C18:1-2OH	C18 H34 O4	314.246	7.63	39003	45645	43832	0	27997	30261
C18:2 -OH	C18 H32 O3	296.235	5.28	38670	23974	0	0	0	187609
C18:2 -2OH	C18 H32 O4	312.229	4.97	179553	328963	122470	145640	141079	324306
3-C20:0 -OH	C20 H40 O3	328.296	7.72	31605	34946	0	0	44423	0
C20:4 -OH	C20 H32 O3	320.236	5.78	71686	12120	17342	83412	0	454926
C22:6 -OH	C22 H32 O3	344.236	5.9	46411	0	0	36412	0	150921

## Sheet: Mucor pts_fig.3a
	Control patients
Name	Formula	Mas	RT	M1	M2	M3	M4	M5	M6	M7	M8	M9	M10	M11	M12	M13	M14	M15	M16	M17	M18
C16:0	C16 H32 O2	256.241	7.73	658883	1.26849e+06	977912	1.41336e+06	951686	708862	1.19495e+06	1.38704e+06	626720	1.45833e+06	1.79441e+06	1.17212e+06	954909	1.68984e+06	887036	912142	716438	1.01555e+06
C16:1	C16 H30 O2	254.225	7.22	62833.2	341703	138753	609581	137047	42147.4	374572	265316	31039	366621	309680	100835	88561.7	376817	110590	120927	78145.1	133111
2-C18:0	C18 H36 O2	284.272	8.51	536571	689317	559913	697890	640789	520302	677078	717481	557285	651505	789418	1.00545e+06	799167	1.022e+06	875723	972619	814408	1.00149e+06
C18:1	C18 H34 O2	282.257	7.85	1.69449e+06	4.62807e+06	3.01559e+06	5.00407e+06	1.62943e+06	2.17524e+06	3.66599e+06	4.69614e+06	1.20454e+06	5.34185e+06	7.24425e+06	3.17667e+06	2.74725e+06	6.90967e+06	2.35735e+06	2.21276e+06	2.20137e+06	3.61991e+06
C18:2	C18 H32 O2	280.241	7.4	1.71554e+06	1.69969e+06	1.44841e+06	3.39698e+06	861908	644121	1.2584e+06	2.1443e+06	957321	3.47507e+06	2.07757e+06	1.60617e+06	1.49534e+06	3.44087e+06	826486	1.13973e+06	2.08279e+06	2.45374e+06
C18:3	C18 H30 O2	278.224	7.02	173993	237826	259244	279829	121550	56956.1	236530	190653	118267	848937	222038	220817	197658	384789	127362	112893	290335	357296
C20:3	C20 H34 O2	306.255	7.73	92114.1	57872.5	58996.9	97737.7	148866	37970.6	52450.5	130226	31813.9	51146.5	65839.4	66682.9	57410.9	241043	87590.4	48983.9	51343.1	57274.6
C20:4	C20 H32 O2	304.241	7.33	1.92745e+06	1.95323e+06	2.61332e+06	5.50205e+06	2.33466e+06	729479	915651	5.26267e+06	810049	1.69378e+06	566665	2.43365e+06	1.01024e+06	3.63154e+06	1.21056e+06	1.20967e+06	1.40046e+06	1.07294e+06
1-C20:5	C20 H30 O2	302.225	6.03	405983	649972	958785	610392	1.26928e+06	320054	529251	642324	488105	420666	399403	187541	156624	264568	161018	71682.6	1.2476e+06	109631
C22:4	C22 H36 O2	332.272	7.8	57284.3	54378.1	42879.9	93408.8	44331.5	42642	38731.7	95061.3	18053.8	99128.6	84455.7	128740	55371	177816	51870.5	67044.4	61288.7	67363.5
2-C22:5	C22 H34 O2	330.256	7.44	90650.8	157448	106212	256772	102688	66972.9	89573.3	281417	82347.5	189470	237256	197672	93850.7	278953	65152.5	63168.3	229089	123548
C22:6	C22 H32 O2	328.241	7.26	954636	1.44877e+06	842829	3.11612e+06	410418	441318	515910	5.19007e+06	1.2089e+06	1.6217e+06	1.59831e+06	1.12407e+06	656666	1.4574e+06	398863	480860	1.45164e+06	848513
C16:0 -OH	C16 H32 O3	272.236	7.01	483347	985627	1.25368e+06	590761	996954	514595	537429	730292	1.43213e+06	1.52295e+06	397054	659144	308746	391671	334135	328967	213285	323972
3-C18:0-OH	C18 H36 O3	300.267	7.69	127149	184544	411998	98313.6	315157	93259.7	126069	190167	220954	173535	90788.6	290775	183123	215588	240794	178322	162322	180146
2-C18:1-OH	C18 H34 O3	298.251	6.92	43753.6	162584	156166	189678	62150.5	74711	143557	258779	73246.3	115235	150308	66243.8	92583.5	125781	146108	124248	125350	105146
1-C18:1-2OH	C18 H34 O4	314.246	5.88	31811.1	32814.2	29720.8	40655.7	33353.7	148904	33259	24453.8	39430.8	154625	292035	77581.6	49043	110189	326376	72488.6	97969.1	55697.7
2-C18:1-2OH	C18 H34 O4	314.246	7.17	30094.9	31922.9	50216.7	19356.4	93520.8	1530.83	79822.8	66432	54917.8	36491.7	35410.3	79217.3	71001.8	69352.6	72779.6	61891	74200.3	47970.5
C18:2 -OH	C18 H32 O3	296.236	5.66	6.65592e+06	1.616e+07	2.04084e+07	2.84625e+07	4.48194e+06	5.03072e+06	1.28775e+07	1.00451e+07	1.64705e+07	1.36204e+07	43874	226737	678279	384007	109350	114291	70493.2	255940
C18:2 -2OH	C18 H32 O4	312.231	5.39	399278	187590	662051	190671	521716	1.02664e+06	194644	223246	454161	1.85398e+06	2.25164e+06	365867	287930	252102	326068	802767	112294	705272
3-C20:0 -OH	C20 H40 O3	328.297	8.01	61847.3	27677.1	25284.9	7687.37	23660.4	61761.1	69405.3	15235.7	45271.3	21918.3	9584.45	39147.1	25277.7	0	61041.7	152789	154144	28707.7
C20:4 -OH	C20 H32 O3	320.236	6.01	2.5219e+06	5.21416e+06	7.3611e+06	4.6353e+06	1.03559e+07	2.38886e+06	3.16655e+06	4.01147e+06	3.587e+06	2.41128e+06	48978.2	2.1284e+06	1.14205e+06	1.7168e+06	374533	412732	22294.8	683811
C22:6 -OH	C22 H32 O3	344.236	5.95	417459	1.22004e+06	950818	514250	582120	502213	490540	1.11744e+06	1.50903e+06	1.51142e+06	516350	884558	526623	445055	114057	82488.3	83219.5	265333

## Sheet: N control _fig.3b
				Control samples
Name	Formula	Mas	RT	N1	N2	N3bis	N4	N5	N6	N7	N8	N9	N10	N11	N12	N13	N14	N15	N16	N17	N18	N19	N20	N21
C16:0	C16 H32 O2	256.241	7.73	718280	494681	313958	823171	1.26431e+06	455019	595331	468372	910684	1.0532e+06	588495	725183	649693	954438	1.3065e+06	715656	1.24236e+06	841982	1.53523e+06	813325	847818
C16:1	C16 H30 O2	254.225	7.22	78500.2	72889.4	32307.3	137905	602431	25409	45762.8	30518.9	59281.8	160621	37854.3	97258.5	49243.8	165815	200548	121951	352624	104114	201107	97295.7	273932
2-C18:0	C18 H36 O2	284.272	8.51	468419	487740	375109	489169	553516	432090	509074	417457	598927	557232	478678	488939	461261	615996	717778	503054	559060	454490	610839	625896	569002
C18:1	C18 H34 O2	282.257	7.85	2.36894e+06	2.03238e+06	688576	2.66449e+06	5.21912e+06	859009	1.39579e+06	900146	2.76858e+06	2.71309e+06	1.62814e+06	2.09819e+06	1.66512e+06	3.12022e+06	5.20107e+06	2.41791e+06	6.18892e+06	1.82473e+06	4.39112e+06	2.15654e+06	4.87876e+06
C18:2	C18 H32 O2	280.241	7.4	1.1278e+06	562876	227094	1.11954e+06	1.68243e+06	820126	624917	294797	2.80671e+06	3.04556e+06	580998	927272	1.08112e+06	1.33764e+06	2.53952e+06	851887	1.5457e+06	850069	1.29499e+06	1.03167e+06	1.93643e+06
C18:3	C18 H30 O2	278.224	7.02	84116.9	35646.8	17331.3	121300	144542	48704.9	74173.1	39850	105535	146349	21920.6	48715.2	90586	118573	134627	76236.4	167390	44170.3	116766	67263.9	163114
C20:3	C20 H34 O2	306.255	7.73	35345.7	31607.3	28957.1	54375.9	97356.7	32786.6	62087.9	33487.2	45830.2	45841.4	33384.5	47715	38050.6	49877.3	51721.9	57662.4	121537	41246.4	121779	49120.5	49451.2
C20:4	C20 H32 O2	304.241	7.33	713559	497549	564557	761004	1.58469e+06	593579	982452	670816	1.41744e+06	1.08556e+06	549120	1.07565e+06	669371	871054	990951	867438	1.51023e+06	1.26771e+06	1.56387e+06	1.0011e+06	519614
1-C20:5	C20 H30 O2	302.225	6.03	7641.94	1735.96	0	3915.14	38256.9	3822.6	9027.97	4054.27	10761.1	7335.35	3169.18	20141.9	1766.57	2657.11	6862.26	22705.8	4140.66	4606.35	0	4037.5	4115.77
C22:4	C22 H36 O2	332.272	7.8	31084	31248.8	20627.6	40917.6	143227	38999.4	57625.8	29249.4	117619	109654	35706.2	69863.6	43239.3	56486.2	60676.3	75797.5	58581.8	51482	77983.5	60127.8	39154.1
2-C22:5	C22 H34 O2	330.256	7.44	38403.9	40204.3	18613.7	64716.8	127867	28942.8	46735.4	27195.7	73002.1	70511.3	30080.7	63907.3	52736.8	119258	91192.9	49556.6	111029	43144.6	122728	51513.3	50542.2
C22:6	C22 H32 O2	328.241	7.26	531810	483461	229924	707383	1.2482e+06	194828	431908	466808	394272	535139	359089	509310	716617	1.12315e+06	678132	494089	1.24876e+06	723772	2.52796e+06	673498	159356
C16:0 -OH	C16 H32 O3	272.236	7.01	392638	398693	249765	381648	555345	246409	303360	497377	347374	545509	293961	363244	316573	401239	451686	343392	856993	502262	776940	347381	370080
3-C18:0-OH	C18 H36 O3	300.267	7.69	90301.5	86521.5	97232.5	101949	181040	76927.5	91993.2	115040	96993.2	135080	74621.4	103491	123009	102554	98812.2	85443.3	154900	184789	234311	103122	87235.3
2-C18:1-OH	C18 H34 O3	298.251	6.92	63281.7	125583	64963.3	73947.8	143753	54675.6	86653.9	42593.9	167536	132968	74007.5	81961.5	90890.5	158680	148437	106316	109620	54284.2	340833	59832.7	212088
1-C18:1-2OH	C18 H34 O4	314.246	5.88	30403.8	24132.8	16801.5	28384.6	197696	38372.5	22418.4	29097.9	20157.3	27478.8	50143.7	102572	34526.8	28840.2	52109	36553.8	27522.4	32932.2	59494.8	22704	19788.2
2-C18:1-2OH	C18 H34 O4	314.246	7.17	31518.3	6305.6	3204.75	7800.42	11308.7	73815.5	26994.6	38168.9	21733.8	35996.3	7697.71	21423.8	53423.2	15202.5	49196.2	13264.5	4610.53	13313.2	14111.5	5359.24	31543.6
C18:2 -OH	C18 H32 O3	296.236	5.66	30582.7	14439.9	43893.5	28012.1	37838.6	52319.5	17013.8	28134.3	30779	32313.4	15117.6	15614.6	15488	33209.2	39440.2	19672.4	18387.7	11530.9	29899	21574.4	50209.3
C18:2 -2OH	C18 H32 O4	312.231	5.39	392367	172152	187942	315181	2.7346e+06	464142	129441	213331	157138	264923	310542	570931	139510	382209	593426	215897	309789	214093	367397	114385	260630
3-C20:0 -OH	C20 H40 O3	328.297	8.01	36271.4	17122.7	9066.66	12415.9	28266	5951.62	9432.97	39947	21632	36275.8	7762.18	15478.7	8042.84	36968.4	36600.9	13431.1	6165.65	30747.9	55689.4	17287.3	6385.99
C20:4 -OH	C20 H32 O3	320.236	6.01	253952	20637.9	84731.9	68297.7	1.08003e+06	54479.6	256026	260362	295503	179747	82804.4	598252	52606.5	145710	251056	700967	176942	207028	18104.3	201343	122469
C22:6 -OH	C22 H32 O3	344.236	5.95	25655.4	7456.71	16242.8	7514.03	129872	21055.4	22125.2	24910.9	19801	18139.6	13613	50894.7	7588.17	16657.1	30891.7	54830	21083.9	19769.3	20224.9	9286.44	26451.1

## Sheet: HM pts_fig.3b
				Malignancy patients
Name	Formula	Mass	RT	HM1	HM2	HM3	HM4	HM5	HM6	HM7	HM8	HM9	HM10	HM11	HM12	HM13	HM14	HM15bis	HM16	HM17	HM18	HM19	HM20
C16:0	C16 H32 O2	256.241	7.73	407603	444862	1.22938e+06	553034	1.00888e+06	858201	1.02048e+06	931061	703438	1.22445e+06	628329	793658	656082	717799	489207	609628	428293	311941	346082	509075
C16:1	C16 H30 O2	254.225	7.22	31111.4	57292.9	308808	56714.9	184988	115551	109786	460925	103628	246781	100344	102406	54625.9	184812	54296.1	65690.9	37776.6	18769.7	29575.3	45048.2
2-C18:0	C18 H36 O2	284.272	8.51	364081	469512	578474	438476	595497	539973	480002	562464	520357	667381	448987	469865	426495	463864	387267	522832	392501	358416	339666	486547
C18:1	C18 H34 O2	282.257	7.85	915278	1.46229e+06	4.76643e+06	1.34089e+06	3.93469e+06	2.60845e+06	2.48721e+06	3.78288e+06	2.83007e+06	6.18695e+06	2.35643e+06	3.00804e+06	1.93568e+06	3.05836e+06	1.34528e+06	2.28027e+06	1.55195e+06	702338	535813	1.76717e+06
C18:2	C18 H32 O2	280.241	7.4	488257	482841	1.87505e+06	524805	1.26033e+06	1.22072e+06	1.04013e+06	1.21658e+06	668918	2.16627e+06	638194	993966	787848	867434	558679	687475	491668	198042	263825	984249
C18:3	C18 H30 O2	278.224	7.02	30182.6	29755.6	211801	19731.5	56580.4	42197.1	96990.7	106956	40183.5	101393	82194	67857.9	69944.6	80302.8	48944.1	80082	63010	29505.5	17957.9	130755
C20:3	C20 H34 O2	306.255	7.73	23466.9	27775.6	68145.2	31045.4	44357.4	44555.4	37568.6	57812.3	39642.4	58109.7	46705.7	57896.6	29966.1	38018	27683.2	50419.3	36150.1	18298.4	27691.9	37617.1
C20:4	C20 H32 O2	304.241	7.33	210135	214620	1.59226e+06	609251	956420	788423	362926	565015	654506	731928	769300	771383	1.08647e+06	448973	293551	786171	677340	232013	948003	696739
1-C20:5	C20 H30 O2	302.225	6.03	15106.8	15271	22264.8	16406.9	30386.5	11847.1	52511.8	11211.8	56197	21894.9	73330	30176.7	53462	39959	29152.4	24030.9	27960.6	13650.4	35859	14061.9
C22:4	C22 H36 O2	332.272	7.8	10847.5	28267.6	75531.1	23401.6	92414.9	67309.6	37396	62088.9	47774.6	131723	38445.3	50203.3	37384.2	50950.7	20844.4	35519.5	18085.2	9797.18	16726	22650.8
2-C22:5	C22 H34 O2	330.256	7.44	16585.1	31728.7	130155	24493.4	89639.6	77040.6	42267.4	65757.4	65104	136235	50678.2	102348	32453.7	50405.9	50566.6	53142.2	34231.7	19520.3	36836	50713.4
C22:6	C22 H32 O2	328.241	7.26	222615	412004	1.21554e+06	260827	889141	807299	385451	295158	685641	1.28839e+06	535445	881221	273403	591332	923170	766604	461138	151324	565051	762331
C16:0 -OH	C16 H32 O3	272.236	7.01	206560	451910	415948	248749	490314	315646	278055	387165	214706	803004	327723	227279	241188	242059	290592	286472	261277	206123	292789	323909
3-C18:0-OH	C18 H36 O3	300.267	7.69	49391.9	82135.4	93558.4	65948.1	83109.9	70303.1	80077.1	89382.8	67831.2	119908	65250.6	52912.2	55290.5	49603.6	70328.7	86793	62268.6	48247.6	70858.2	68959.8
2-C18:1-OH	C18 H34 O3	298.251	6.92	23974.8	61274.7	131303	34012.5	105662	64960.3	58212.5	110343	52202.6	186684	81640	51201.3	80139.9	89803	65551.4	86957.5	63806.1	30045.5	24805.8	60062.3
1-C18:1-2OH	C18 H34 O4	314.246	5.88	24178.7	46114.5	15861.2	26259.5	287232	53900.8	47017.9	112524	17695.1	1.18652e+06	13950.6	12710.6	19449.3	36330	47448.4	25810.3	24120.4	21847.8	26051.8	27272.2
2-C18:1-2OH	C18 H34 O4	314.246	7.17	8042.43	23529.7	53072.4	8226.73	8792.72	6640.27	14185.1	6875.45	6419.1	7679.67	15812.2	6853.46	21582.9	6003.91	15339.5	13483.2	8053.13	15172.8	4938.83	10992.7
C18:2 -OH	C18 H32 O3	296.236	5.66	55239.9	9203.15	31836.1	19022.1	36446.6	34451.4	20934.4	25534	36330.4	15919.9	48984.7	37059.3	45320.3	14323.3	20658.4	32406.3	19798.6	38639.4	22074.4	26438.5
C18:2 -2OH	C18 H32 O4	312.231	5.39	312728	407046	88959.5	210509	2.31166e+06	339534	488290	1.37159e+06	151211	7.17693e+06	225688	147933	120020	299856	105105	205341	104505	184749	172071	119760
3-C20:0 -OH	C20 H40 O3	328.297	8.01	8873.98	10329.7	35126.5	15629.7	15022.1	7923.39	8366.02	7601.18	5463.05	38262.2	8005.85	4260.48	9739.96	6904.4	11051.6	12353.8	11976.3	8765.27	12705.1	9178.62
C20:4 -OH	C20 H32 O3	320.236	6.01	108987	68505.2	684962	510153	931016	367584	43177.2	272174	1.61416e+06	122396	2.18934e+06	801762	1.60318e+06	93139.4	27421.7	759039	824078	57495.2	966636	443500
C22:6 -OH	C22 H32 O3	344.236	5.95	28243.8	28550.9	22541.6	30674.5	88900.7	50964.8	155294	20681.7	238222	41415.6	192521	142228	60453.6	175434	93471.4	97980.9	89650	25521	92017.9	48697.4

## Sheet: Cir pts_fig.3b
				Cirrhotic patients
Name	Formula	Mass	RT	C1	C2	C3	C4	C5	C6	C8	C9bis	C10	C11	C12	C13	C15	C16	C17	C18	C19	C20
C16:0	C16 H32 O2	256.241	7.73	866471	1.32455e+06	354179	389795	275565	318758	513808	1.03212e+06	337430	1.21328e+06	400558	1.42549e+06	712107	829302	526691	1.41481e+06	737624	720532
C16:1	C16 H30 O2	254.225	7.22	411285	388299	34777.3	31275.1	28588.8	37738.6	52168	336065	18760.7	373352	51098.4	339917	61871.2	94420.8	63332.5	454325	32629.5	160113
2-C18:0	C18 H36 O2	284.272	8.51	446995	840756	367553	376534	356089	365948	387864	503704	358439	619217	373265	602026	544368	528087	455538	616081	454891	402339
C18:1	C18 H34 O2	282.257	7.85	3.99442e+06	7.50334e+06	721638	1.06944e+06	330962	611012	1.56362e+06	3.62259e+06	655014	5.59709e+06	782478	4.74838e+06	2.77937e+06	2.6202e+06	1.72681e+06	5.7126e+06	1.40923e+06	2.10176e+06
C18:2	C18 H32 O2	280.241	7.4	1.05109e+06	1.58027e+06	370528	530337	97298	219449	587877	1.02846e+06	213989	1.62772e+06	198392	1.8037e+06	815179	1.60338e+06	454760	934176	783087	949565
C18:3	C18 H30 O2	278.224	7.02	75791.9	176463	21092.1	35817.2	39515.8	18134.6	56229.7	73165.4	49320	136033	16772.4	196347	90031.1	86613.7	42378.9	134808	60181.7	62606.4
C20:3	C20 H34 O2	306.255	7.73	65716.4	108444	26766.1	40455.7	19605.7	31360.1	28565.9	42939.3	25862.2	56076.8	45534	96089.9	50464	37627.8	38370	171581	26291.5	37472.4
C20:4	C20 H32 O2	304.241	7.33	569448	576607	242328	213243	186098	362916	178455	260142	294047	450405	200877	742857	321531	434268	441519	1.07504e+06	391803	306380
1-C20:5	C20 H30 O2	302.225	6.03	0	0	0	0	0	0	0	0	0	0	0	0	0	7474.21	7976.32	15941.4	0	0
C22:4	C22 H36 O2	332.272	7.8	62885	102310	25126.2	26086.4	9446.43	32422.6	20965.2	46841.8	18898.7	68065.5	15558.1	107123	48934.6	34488.2	23244.8	99588.4	29176.4	42571.4
2-C22:5	C22 H34 O2	330.256	7.44	65840	135043	15159.9	22434.7	10520.1	26188.7	24695.1	44027.7	13685.1	73997.6	11906.7	172204	50973.3	28417.9	31336.1	131082	25804.4	37187
C22:6	C22 H32 O2	328.241	7.26	584156	1.04427e+06	197280	222299	138589	266777	317865	324047	189359	548875	218310	1.65967e+06	716133	348840	538945	2.11331e+06	143531	457630
C16:0 -OH	C16 H32 O3	272.236	7.01	594272	1.18607e+06	408653	303370	295573	364450	328009	788834	306896	1.06559e+06	512388	375221	579597	504518	353972	599428	347380	365685
3-C18:0-OH	C18 H36 O3	300.267	7.69	84208.1	196578	126422	49122.4	51546.5	58686.2	87895.2	113532	62833.7	145630	66138.8	96518.5	135763	117920	92120.9	133059	79477.7	90012.6
2-C18:1-OH	C18 H34 O3	298.251	6.92	144135	490311	62315.5	35417.8	27834.8	72472.2	77285.3	146661	59610.5	229641	31594	170341	131000	77634.7	76231.6	338025	35302.9	163337
1-C18:1-2OH	C18 H34 O4	314.246	5.88	40781.4	291140	23951.9	21027.2	26849.1	81612.4	36387.5	224600	15684.1	337323	44886.4	37340.7	60433.9	56852.7	41309.9	33172.7	23473	32441.6
2-C18:1-2OH	C18 H34 O4	314.246	7.17	23339.1	7283.93	27453.9	10112	21813.6	17887	29455.7	19639.4	13518.4	19517.8	33945.7	16149.3	3025.71	57979.7	2938.58	11997.2	43418.9	31982.9
C18:2 -OH	C18 H32 O3	296.236	5.66	22687.1	49344.8	69722.9	102012	12357.1	12448.6	17069.7	25220.7	11495	20003.2	72691.6	18891.9	162527	47309.2	28816.2	8313.37	57433.6	48460.4
C18:2 -2OH	C18 H32 O4	312.231	5.39	682826	3.34929e+06	391665	278959	418069	1.17166e+06	532832	2.00443e+06	240422	3.37907e+06	850299	320501	547998	431934	391225	267040	337923	290864
3-C20:0 -OH	C20 H40 O3	328.297	8.01	31101.3	53350.9	17654.7	11004.6	50251.3	72683.8	27084.8	44048.2	17597.9	36224.5	22893.4	34204.1	20548.5	11803.6	23710	46873.1	16925.3	28171.5
C20:4 -OH	C20 H32 O3	320.236	6.01	101089	45631.9	30676.6	18648.8	20112.8	120882	143113	54344	36805.2	69157.2	44460.5	34359.7	8484.48	108321	219277	437126	65701.1	172280
C22:6 -OH	C22 H32 O3	344.236	5.95	0	0	0	0	0	0	0	0	0	12156.9	0	13153.1	0	0	36453.8	105209	44084.6	0

## Sheet: isolated human albumin Fig2b
						Isolated human albumin
Name	Formula	[M-H]-	Mass	RT	Donor_1a	Donor_1b	Donor_2a	Donor_2b	Donor_3a	Donor_3b
C12:0	C12 H24 O2	199.169	200.177	5.88	9815	7917	8059	10987	10361	12399
1-C14:0	C14 H28 O2	227.202	228.209	6.79	40056	39848	33987	33527	38272	35477
2-C14:0	C14 H28 O2	227.202	228.209	6.91	15767	13199	14656	12710	14731	14637
1-C16:0	C16 H32 O2	255.233	256.241	7.51	2264299	2189367	1642310	1757236	2747356	2761059
1-C16:1	C16 H30 O2	253.218	254.225	6.97	92681	92771	40910	40511	148555	154006
2-C16:1	C16 H30 O2	253.218	254.225	7.04	60418	59800	39703	33836	54446	47960
1-C18:0	C18 H36 O2	283.257	284.264	7.63	70689	69797	47431	49477	136837	140820
2-C18:0	C18 H36 O2	283.265	284.272	8.3	2392121	2278359	2092855	2255645	2775174	2918536
C18:1	C18 H34 O2	281.249	282.256	7.63	4704861	4608706	2418212	2554416	8342551	8369975
C18:2	C18 H32 O2	279.234	280.241	7.18	1897042	1807669	863638	977168	8290703	8451836
1-C18:3	C18 H30 O2	277.217	278.224	6.74	50602	50796	24385	24989	197416	217989
2-C18:3	C18 H30 O2	277.216	278.223	6.79	40542	41685	24671	23772	87312	65745
2-C20:3	C20 H34 O2	305.248	306.255	7.37	71558	73289	49367	52975	125337	129179
3-C20:3	C20 H34 O2	305.246	306.253	7.51	39110	40895	22566	25213	48279	51038
C20:4	C20 H32 O2	303.233	304.241	7.11	1144693	1105000	1042309	1118034	1943509	1973407
C20:5	C20 H30 O2	301.218	302.225	6.69	124907	134672	56661	51516	175918	181322
C22:4	C22 H36 O2	331.265	332.272	7.58	55945	60823	42064	52189	125096	137412
2-C22:5	C22 H34 O2	329.249	330.256	7.23	41038	39148	18797	26999	102527	103039
3-C22:5	C22 H34 O2	329.249	330.256	7.38	71885	61431	40055	48579	126704	123831
C22:6	C22 H32 O2	327.234	328.241	7.02	988352	937323	511447	561051	1706699	1695327
1-C16:0 -OH	C16 H32 O3	271.228	272.235	5.78	51145	49085	114134	124085	43852	47358
2-C16:0 -OH	C16 H32 O3	271.228	272.235	6.01	102970	105366	175839	182099	69120	67269
3-C16:0 -OH	C16 H32 O3	271.228	272.235	6.41	80683	71669	113241	113672	37974	43765
4-C16:0 -OH	C16 H32 O3	271.228	272.235	6.59	43126	42600	44147	51427	44126	46244
5-C16:0 -OH	C16 H32 O3	271.228	272.236	6.75	344523	324152	334781	367935	294776	303127
C16:0 -2OH	C16 H32 O4	287.223	288.23	4.9	14227	14304	9121	18993	12018	11359
1-C16:1 -OH	C16 H30 O3	269.212	270.219	6.34	58653	53145	88703	90603	55816	52329
2-C16:1 -OH	C16 H30 O3	269.212	270.219	6.53	45149	43104	46924	45508	45063	46082
1-C18:0-OH	C18 H36 O3	299.259	300.266	6.67	52145	47274	75930	72929	41085	42846
2-C18:0-OH	C18 H36 O3	299.26	300.267	6.97	112536	107614	158929	176700	87275	84370
3-C18:0-OH	C18 H36 O3	299.259	300.267	7.28	132040	108324	159074	189632	114806	121418
4-C18:0-OH	C18 H36 O3	299.259	300.267	7.51	204131	198223	188514	230805	210982	197469
1-C18:0-2OH	C18 H36 O4	315.254	316.261	4.71	31950	31552	65201	62629	89832	90014
2-C18:0-2OH	C18 H36 O4	315.254	316.261	5.29	24430	24014	26640	24297	22557	28930
3-C18:0-2OH	C18 H36 O4	315.253	316.26	5.43	20735	20482	22112	23510	20837	24456
1-C18:1-OH	C18 H34 O3	297.241	298.249	5.41	117016	99329	92145	90656	123422	122384
2-C18:1-OH	C18 H34 O3	297.242	298.249	5.57	109890	104281	86580	96677	195416	203047
3-C18:1-OH	C18 H34 O3	297.244	298.251	5.77	0	0	0	0	0	0
4-C18:1-OH	C18 H34 O3	297.244	298.252	6.45	0	0	0	0	0	0
5-C18:1-OH	C18 H34 O3	297.244	298.251	6.65	155942	145359	151881	168309	210525	169801
1-C18:1-2OH	C18 H34 O4	313.239	314.246	5.82	0	0	0	0	0	0
3-C18:1-2OH	C18 H34 O4	313.239	314.246	5.74	0	0	0	0	0	0
4-C18:1-2OH	C18 H34 O4	313.238	314.245	6.91	53841	56285	72818	61688	101513	103716
1-C18:1-3OH	C18 H34 O5	329.233	330.24	4.62	44076	43567	48181	39794	40753	41935
2-C18:1-3OH	C18 H34 O5	329.239	330.246	7.02	24490	23628	11121	19717	57879	57944
1-C18:2 -OH	C18 H32 O3	295.228	296.235	5.25	40084	31562	47342	51384	96230	107129
2-C18:2 -OH	C18 H32 O3	295.228	296.236	5.41	0	0	0	0	0	0
3-C18:2 -OH	C18 H32 O3	295.228	296.236	5.74	0	0	0	0	0	0
4-C18:2 -OH	C18 H32 O3	295.228	296.236	5.82	0	0	0	0	0	0
5-C18:2 -OH	C18 H32 O3	295.229	296.236	5.91	0	0	0	0	0	0
6-C18:2 -OH	C18 H32 O3	295.228	296.235	6.13	0	0	0	0	0	0
C18:2 -2OH	C18 H32 O4	311.222	312.229	4.91	269726	248479	905785	947171	399703	408991
1-C18:3 -OH	C18 H30 O3	293.211	294.219	5.12	0	0	30010	30867
1-C20:0 -OH	C20 H40 O3	327.288	328.295	6.72	21134	17173	29940	37902	30382	26209
4-C20:0 -OH	C20 H40 O3	327.29	328.297	7.71	62210	58803	36898	39848	51227	43942
5-C20:0 -OH	C20 H40 O3	327.289	328.296	7.81	115863	111766	76780	80621	57250	63970
C20:4 -OH	C20 H32 O3	319.227	320.234	5.61	116695	109137	87583	100384	37922	38455
1-C22:0 -OH	C22 H44 O3	355.321	356.329	7.43	87075	72116	167986	172760	49343	43691
2-C22:0 -OH	C22 H44 O3	355.321	356.329	7.44	39933	38725	51408	58874	44110	39611
3-C22:0 -OH	C22 H44 O3	355.322	356.329	7.51	33768	35146	32879	31376	47761	49000
1-C22:4 -2OH	C22 H36 O4	363.254	364.261	5.81	42363	41474	61338	75594	61778	68960
2-C22:4 -2OH	C22 H36 O4	363.253	364.26	6.19	38735	38040	57785	60343	44114	43203

## Sheet: flow through human albuminFig2b
							Flow Through
Name	Formula	[M-H]-	Mass	RT	Flow_1a	Flow_1b	Flow_2a	Flow_2b	Flow_3a	Flow_3b
C12:0	C12 H24 O2	199.169	200.177	5.88	0	0	0	0	0	0
1-C14:0	C14 H28 O2	227.202	228.209	6.79	0	0	0	0	0	0
2-C14:0	C14 H28 O2	227.202	228.209	6.91	0	0	0	0	0	0
1-C16:0	C16 H32 O2	255.233	256.241	7.51	658445	687010	672785	651021	661794	657547
1-C16:1	C16 H30 O2	253.218	254.225	6.97	0	0	0	0	0	0
2-C16:1	C16 H30 O2	253.218	254.225	7.04	0	0	0	0	0	0
1-C18:0	C18 H36 O2	283.257	284.264	7.63	0	0	0	0	0	0
2-C18:0	C18 H36 O2	283.265	284.272	8.3	1356520	1326897	1316472	1330556	1286765	1349230
C18:1	C18 H34 O2	281.249	282.256	7.63	93691	99355	97520	95621	106118	100139
C18:2	C18 H32 O2	279.234	280.241	7.18	0	0	0	0	0	0
1-C18:3	C18 H30 O2	277.217	278.224	6.74	0	0	0	0	0	0
2-C18:3	C18 H30 O2	277.216	278.223	6.79	0	0	0	0	0	0
2-C20:3	C20 H34 O2	305.248	306.255	7.37	0	0	0	0	0	0
3-C20:3	C20 H34 O2	305.246	306.253	7.51	0	0	0	0	0	0
C20:4	C20 H32 O2	303.233	304.241	7.11	0	0	0	0	0	0
C20:5	C20 H30 O2	301.218	302.225	6.69	0	0	0	0	0	0
C22:4	C22 H36 O2	331.265	332.272	7.58	0	0	0	0	0	0
2-C22:5	C22 H34 O2	329.249	330.256	7.23	0	0	0	0	0	0
3-C22:5	C22 H34 O2	329.249	330.256	7.38	0	0	0	0	0	0
C22:6	C22 H32 O2	327.234	328.241	7.02	0	0	0	0	0	0
1-C16:0 -OH	C16 H32 O3	271.228	272.235	5.78	0	0	0	0	0	0
2-C16:0 -OH	C16 H32 O3	271.228	272.235	6.01	0	0	0	0	0	0
3-C16:0 -OH	C16 H32 O3	271.228	272.235	6.41	0	0	0	0	0	0
4-C16:0 -OH	C16 H32 O3	271.228	272.235	6.59	0	0	0	0	0	0
5-C16:0 -OH	C16 H32 O3	271.228	272.236	6.75	0	0	0	0	0	0
C16:0 -2OH	C16 H32 O4	287.223	288.23	4.9	12904	21322	24058	17451	20051	14110
1-C16:1 -OH	C16 H30 O3	269.212	270.219	6.34	33614	31377	37488	35765	33163	31766
2-C16:1 -OH	C16 H30 O3	269.212	270.219	6.53	24656	22209	23338	22522	21768	24287
1-C18:0-OH	C18 H36 O3	299.259	300.266	6.67	45947	41066	50155	46822	42862	40866
2-C18:0-OH	C18 H36 O3	299.26	300.267	6.97	96198	98985	104225	97562	101352	97180
3-C18:0-OH	C18 H36 O3	299.259	300.267	7.28	78223	85815	91554	79996	76559	76702
4-C18:0-OH	C18 H36 O3	299.259	300.267	7.51	109521	109817	109892	114854	101911	110776
1-C18:0-2OH	C18 H36 O4	315.254	316.261	4.71	0	0	0	0	0	0
2-C18:0-2OH	C18 H36 O4	315.254	316.261	5.29	15912	11455	12749	9447	12758	13949
3-C18:0-2OH	C18 H36 O4	315.253	316.26	5.43	21901	26141	25470	26347	25605	23777
1-C18:1-OH	C18 H34 O3	297.241	298.249	5.41	0	0	0	0	0	0
2-C18:1-OH	C18 H34 O3	297.242	298.249	5.57	0	0	0	0	0	0
3-C18:1-OH	C18 H34 O3	297.244	298.251	5.77	0	0	0	0	0	0
4-C18:1-OH	C18 H34 O3	297.244	298.252	6.45	0	0	0	0	0	0
5-C18:1-OH	C18 H34 O3	297.244	298.251	6.65	0	0	0	0	0	0
1-C18:1-2OH	C18 H34 O4	313.239	314.246	5.82	0	0	0	0	0	0
3-C18:1-2OH	C18 H34 O4	313.239	314.246	5.74	0	0	0	0	0	0
4-C18:1-2OH	C18 H34 O4	313.238	314.245	6.91	0	0	0	0	0	0
1-C18:1-3OH	C18 H34 O5	329.233	330.24	4.62	39128	39237	33661	42655	40331	37072
2-C18:1-3OH	C18 H34 O5	329.239	330.246	7.02	0	0	0	0	0	0
1-C18:2 -OH	C18 H32 O3	295.228	296.235	5.25	0	0	0	0	0	0
2-C18:2 -OH	C18 H32 O3	295.228	296.236	5.41	0	0	0	0	0	0
3-C18:2 -OH	C18 H32 O3	295.228	296.236	5.74	0	0	0	0	0	0
4-C18:2 -OH	C18 H32 O3	295.228	296.236	5.82	0	0	0	0	0	0
5-C18:2 -OH	C18 H32 O3	295.229	296.236	5.91	0	0	0	0	0	0
6-C18:2 -OH	C18 H32 O3	295.228	296.235	6.13	0	0	0	0	0	0
C18:2 -2OH	C18 H32 O4	311.222	312.229	4.91	0	0	0	0	0	0
1-C18:3 -OH	C18 H30 O3	293.211	294.219	5.12	0	0	0	0	0	0
1-C20:0 -OH	C20 H40 O3	327.288	328.295	6.72	0	0	0	0	0	0
4-C20:0 -OH	C20 H40 O3	327.29	328.297	7.71	0	0	0	0	0	0
5-C20:0 -OH	C20 H40 O3	327.289	328.296	7.81	0	0	0	0	0	0
C20:4 -OH	C20 H32 O3	319.227	320.234	5.61	0	0	0	0	0	0
1-C22:0 -OH	C22 H44 O3	355.321	356.329	7.43	52992	61000	67443	47552	60023	58036
2-C22:0 -OH	C22 H44 O3	355.321	356.329	7.44	0	0	0	0	0	0
3-C22:0 -OH	C22 H44 O3	355.322	356.329	7.51	0	0	0	0	0	0
1-C22:4 -2OH	C22 H36 O4	363.254	364.261	5.81	0	0	0	0	0	0
2-C22:4 -2OH	C22 H36 O4	363.253	364.26	6.19	0	0	0	0	0	0

## Sheet: mouse lipidomics Fig5k
				Uninfected
	concentration in ppm			1	2	3	4	5	6	7	8	9	10	11	12
Name	Formula	Mass (Da)	RT (min)	WT						Alb KO
FA 16:0	C16H32O2	256.24	7.47	27.195	23.9384	35.4116	24.8193	80.4373	55.1513	34.4055	26.7069	23.2132	31.9538	32.9241	27.1288
FA 16:1	C16H30O2	254.225	6.95	↓LOQ	↓LOQ	↓LOQ	↓LOQ	21.7994	0.572092	↓LOQ	↓LOQ	↓LOQ	↓LOQ	0.210297	↓LOQ
FA 18:0	C18H36O2	284.271	8.19	4.05385	4.51098	11.0268	7.83419	28.1162	26.5525	11.9572	7.19077	14.7039	22.7473	7.07502	9.72644
FA 18:1	C18H34O2	282.256	7.59	70.6242	53.0296	65.7789	51.5804	197.37	122.856	72.3211	65.2825	62.0943	66.7073	92.8215	57.74
FA 18:2	C18H32O2	280.24	7.16	69.0865	62.3541	73.8375	58.1243	234.863	159.449	43.6708	30.1369	19.7096	28.6533	66.2059	30.2197
FA 20:3	C20H34O2	306.256	7.47	↓LOQ	↓LOQ	↓LOQ	↓LOQ	↓LOQ	↓LOQ	1.82475	2.66873	↓LOQ	↓LOQ	↓LOQ	0.32376
FA 20:4	C20H32O2	304.24	7.09	58.2894	78.1371	107.541	96.3216	230.342	336.305	73.6881	35.4674	32.8828	46.9503	72.1366	41.3535
FA 20:5	C20H30O2	302.224	6.68	↓LOQ	0.187708	5.52656	0.289613	30.8201	45.2383	↓LOQ	↓LOQ	↓LOQ	↓LOQ	↓LOQ	↓LOQ
FA 22:6	C22H32O2	328.24	7	155.017	140.151	270.439	206.757	758.53	695.724	214.943	179.26	126.752	217.251	191.273	111.521
FA 18:0;O	C18H36O3	300.266	7.59	82.6456	62.5236	74.7537	62.6894	↓LOQ	↓LOQ	86.9664	78.3275	73.3862	79.0731	106.087	67.1655
FA 18:1;O	C18H34O3	298.251	5.14	117.534	125.437	129.182	100.552	104.539	108.96	164.616	136.589	107.347	122.415	151.754	179.939
FA 18:2;O	C18H32O3	296.235	5.31	19.7959	18.2652	7.88721	12.5077	61.9522	25.6989	20.9987	34.4776	20.0137	24.2353	23.9622	21.7844
FA 18:2;2O	C18H32O4	312.23	5.04	1.06319	7.67315	↓LOQ	↓LOQ	23.4919	19.983	↓LOQ	↓LOQ	↓LOQ	↓LOQ	9.89178	↓LOQ
FA 20:4;O	C20H32O3	320.235	5.66	361.67	353.436	253.042	332.909	811.604	496.275	264.712	453.268	347.602	488.328	275.374	240.895
FA 22:4;O	C22H36O3	348.266	6.21	↓LOQ	↓LOQ	↓LOQ	↓LOQ	1.45956	↓LOQ	↓LOQ	↓LOQ	↓LOQ	↓LOQ	↓LOQ	↓LOQ
FA 22:5;O	C22H34O3	346.25	5.8	↓LOQ	↓LOQ	↓LOQ	↓LOQ	10.4041	↓LOQ	↓LOQ	↓LOQ	↓LOQ	↓LOQ	↓LOQ	↓LOQ
FA 22:6;O	C22H32O3	344.235	5.59	18.6733	↓LOQ	12.728	14.3386	217.392	86.5914	14.7695	50.6511	27.4521	47.6502	8.60846	15.2639
				Uninfected
	concentration in μM			1	2	3	4	5	6	7	8	9	10	11	12
Name	Formula	Mass (Da)	RT (min)	WT						Alb KO
FA 16:0	C16H32O2	256.24	7.47	106.131	93.4216	138.197	96.8596	313.914	215.233	134.271	104.226	90.5917	124.702	128.489	105.873
FA 16:1	C16H30O2	254.225	6.95	0	0	0	0	85.7487	2.25034	0	0	0	0	0.827208	0
FA 18:0	C18H36O2	284.271	8.19	14.2605	15.8686	38.7899	27.5589	98.9061	93.4057	42.0627	25.2955	51.725	80.0198	24.8883	34.2154
FA 18:1	C18H34O2	282.256	7.59	250.214	187.878	233.047	182.743	699.26	435.265	256.225	231.288	219.993	236.336	328.856	204.566
FA 18:2	C18H32O2	280.24	7.16	246.526	222.503	263.479	207.409	838.076	568.973	155.834	107.539	70.3311	102.245	236.247	107.835
FA 20:3	C20H34O2	306.256	7.47	0	0	0	0	0	0	5.95826	8.71406	0	0	0	1.05716
FA 20:4	C20H32O2	304.24	7.09	191.59	256.827	353.475	316.598	757.105	1105.39	242.204	116.577	108.082	154.32	237.104	135.924
FA 20:5	C20H30O2	302.224	6.68	0	0.621088	18.2863	0.958272	101.977	149.684	0	0	0	0	0	0
FA 22:6	C22H32O2	328.24	7	472.266	426.976	823.906	629.895	2310.9	2119.56	654.834	546.123	386.156	661.864	582.721	339.754
FA 18:0;O	C18H36O3	300.266	7.59	275.241	208.227	248.958	208.779	0	0	289.631	260.86	244.404	263.343	353.308	223.687
FA 18:1;O	C18H34O3	298.251	5.14	394.077	420.576	433.133	337.139	350.509	365.33	551.938	457.969	359.921	410.444	508.813	603.313
FA 18:2;O	C18H32O3	296.235	5.31	66.8249	61.658	26.6249	42.2221	209.132	86.7518	70.8854	116.386	67.5601	81.811	80.8894	73.5378
FA 18:2;2O	C18H32O4	312.23	5.04	3.40515	24.5753	0	0	75.2391	64.0009	0	0	0	0	31.6811	0
FA 20:4;O	C20H32O3	320.235	5.66	1129.39	1103.68	790.176	1039.58	2534.4	1549.72	826.618	1415.42	1085.46	1524.91	859.911	752.243
FA 22:4;O	C22H36O3	348.266	6.21	0	0	0	0	4.19094	0	0	0	0	0	0	0
FA 22:5;O	C22H34O3	346.25	5.8	0	0	0	0	30.048	0	0	0	0	0	0	0
FA 22:6;O	C22H32O3	344.235	5.59	54.2458	0	36.9746	41.6535	631.522	251.547	42.9051	147.141	79.7481	138.423	25.0075	44.3414
